# Supplementary material
Source: Springer Nature journal article supplement (https://www.springermedizin.de/resource/supplementary/12879_2009_1051_MOESM1_ESM.pdf/9442470)
Supplement: MOESM1 [file 9442470]

**Enrolled: 7658**  
**Year 1: 3514**  
**Year 2: 4144**

**Active Safety Set: 3783**  
(analyzed as treated)  
**Year 1: 1734**  
no misdosing  
**Year 2: 2049**  
- 1 misdosed w/ placebo  
+ 2 placebo misdosed w/ active

**Randomized to Active and Treated: 3782**  
**Year 1: 1734**  
**Year 2: 2048**

**Randomized to Placebo and Treated: 3829**  
**Year 1: 1756**  
**Year 2: 2073**

**Placebo Safety Set: 3828**  
(analyzed as treated)  
**Year 1: 1756**  
no misdosing  
**Year 2: 2072**  
- 2 misdosed w/ active  
+ 1 active misdosed w/ placebo

**Active Intent to Immunize: 3754**  
(analyzed as randomized)  
**Year 1: 1715**  
- 19 withdrew consent, or no contact post day 21  
**Year 2: 2039**  
- 9 withdrew consent, or no contact post Day 21

**Placebo Intent to Immunize: 3800**  
(analyzed as randomized)  
**Year 1: 1736**  
- 20 withdrew consent, or no contact post Day 21  
**Year 2: 2064**  
- 9 withdrew consent, or no contact post Day 21

**Per Protocol Immunogenicity: 1298**  
**Year 1: 891**  
**Year 2: 407**

**Active Per Protocol: 3714**  
**Year 1: 1703**  
- 8 prohibited medications  
- 3 violated eligibility criteria  
- 1 partial dose  
**Year 2: 2011**  
- 15 prohibited medications  
- 4 violated eligibility criteria  
- 8 test article exposed to elevated temperature  
- 1 misdosed with placebo

**Placebo Per Protocol: 3768**  
**Year 1: 1725**  
- 9 prohibited medications  
- 1 potential unblinding  
- 1 case records lost  
**Year 2: 2043**  
- 8 prohibited medications  
- 2 violated eligibility criteria  
- 8 test article exposed to elevated temperature  
- 1 case records lost  
- 2 misdosed with active

**Per Protocol Immunogenicity: 216**  
**Year 1: 136**  
**Year 2: 80**
